# Supplementary material for: Telemedicine in Elderly Hypertensive and Patients with Chronic Diseases during the COVID-19 Pandemic: A Systematic Review and Meta-Analysis
Source: MDPI journal article supplement (doi:10.3390/jcm12196160), 2023-09-24
Supplement: s1 [file s1]

Supplementary Table S1. Critical reading of included studies.

| Study                                             | Question 1 | Question 2 | Question 3 |
|---------------------------------------------------|------------|------------|------------|
| Gomes-de Almeida et al., 2021 (Portugal) [22]     | Y          | Y          | Y          |
| Eberly et al., 2020 (USA) [21]                    | Y          | Y          | Y          |
| Summers et al., 2022 (UK) [20]                    | Y          | Y          | Y          |
| Kaufman-Shriqui et al., 2022 (Israel) [29]        | Y          | Y          | Y          |
| Lee et al., 2022 (Korea) [19]                     | Y          | Y          | Y          |
| Rodríguez-Fortúnez et al., 2019 (Spain) [23]      | Y          | Y          | Y          |
| Pierce and Stevermer 2020 (USA) [28]              | Y          | Y          | Y          |
| Barayev et al., 2021 (Israel) [25]                | Y          | Y          | Y          |
| Chang et al., 2021 (USA) [26]                     | Y          | Y          | Y          |
| Zanaboni and Fagerlund, 2020 (Norway) [27]        | Y          | Y          | Y          |
| Dopelt et al., 2021 (Israel) [24]                 | Y          | Y          | Y          |
| Singer A. et al., 2022 (Canada) [30]              | Y          | Y          | Y          |
| Juergens N. et al., 2022 (USA) [31]               | Y          | Y          | Y          |
| Al-Mutairi A. M. et al., 2023 (Saudi Arabia) [32] | Y          | Y          | Y          |
| Ufholz K. et al., 2023 (USA) [33]                 | Y          | Y          | Y          |
| Khairat S. et al., 2020 (USA) [34]                | Y          | Y          | Y          |
| Stamenova V. et al., 2020 (Canada) [35]           | Y          | Y          | Y          |
| Dalbosco-Salas M. et al., 2021 (Chile) [36]       | Y          | Y          | Y          |

Note: Question 1= Did the study address a clearly focused issue? ; Question 2= Was the sample recruited in an acceptable way?; Question 3= Were the outcomes accurately measured to minimise bias? ; Y= yes; N= No.
